# Supplementary material
Source: PubMed Central journal article supplement (PMC4096488)
Supplement: NIHMS562085-supplement-Supp_Table_S1.pdf [file NIHMS562085-supplement-Supp_Table_S1.pdf]

**Supplementary Table 1: A list of tested genes and their primers.**

| <b>Symbol</b> | <b>Name</b>                                         | <b>Primer</b> |
|---------------|-----------------------------------------------------|---------------|
| Ccl2          | chemokine (C-C motif) ligand 2/MCP-1                | Mm00441242_m1 |
| Ccnd1         | cyclin D1                                           | Mm00432359_m1 |
| Ccr2          | chemokine (C-C motif) ligand 2/MCP-1 receptor       | Mm01216173_m1 |
| Ccr7          | chemokine (C-C motif) receptor 7                    | Mm01301785_m1 |
| Cd14          | CD14 antigen                                        | Mm00434464_m1 |
| Cd4           | CD4 antigen                                         | Mm00442754_m1 |
| Cd44          | CD44 antigen                                        | Mm01277163_m1 |
| Colla1        | collagen, type 1, alpha 1                           | Mm00801666_g1 |
| Colla2        | collagen, type 1, alpha 2                           | Mm01165187_m1 |
| Colla3        | collagen, type 3, alpha 1                           | Mm01254473_m1 |
| Cxcr4         | chemokine (C-X-C motif) ligand 12/SDF-1 receptor    | Mm01292123_m1 |
| Emr1          | F4/80                                               | Mm00802529_m1 |
| Eng           | endoglin/CD105                                      | Mm00468256_m1 |
| Fgfr1         | fibroblast growth factor receptor 1                 | Mm00438930_m1 |
| Gapdh         | glyceraldehyde-3-phosphate dehydrogenase            | Mm99999915_g1 |
| Hgf           | hepatocyte growth factor                            | Mm01135193_m1 |
| Il10          | interleukin 10                                      | Mm00439614_m1 |
| Il1a          | interleukin 1 alpha                                 | Mm00439620_m1 |
| Il6           | interleukin 6                                       | Mm00446190_m1 |
| Itgam         | integrin alpha M/CD11b                              | Mm00434464_m1 |
| Itgb1         | integrin beta 1/CD29                                | Mm01253230_m1 |
| Mmp9          | matrix metalloproteinase 9                          | Mm00443991_m1 |
| Pdgfa         | platelet derived growth factor, alpha               | Mm01205760_m1 |
| Pecam1        | platelet/endothelial cell adhesion molecule 1/CD31  | Mm01242584_m1 |
| Ptprc         | protein tyrosine phosphatase, receptor type, C/CD45 | Mm01293575_m1 |
| Tgfb1         | transforming growth factor, beta 1                  | Mm00441726_m1 |
| Tgfr1         | transforming growth factor, beta receptor 1         | Mm00436964_m1 |
| Thy1          | thymus cell antigen 1, theta/CD90                   | Mm00493681_m1 |
| Timp1         | tissue inhibitor of metalloproteinase 1             | Mm00441818_m1 |
| Timp2         | tissue inhibitor of metalloproteinase 2             | Mm00441825_m1 |
| Tnf           | tumor necrosis factor                               | Mm00443258_m1 |
| Vegfa         | vascular endothelial growth factor A                | Mm01281449_m1 |
